# Supplementary material for: N lone-pair⋯π interaction: a rotational study of chlorotrifluoroethylene⋯ammonia
Source: Royal Society of Chemistry journal article supplement (doi:10.1039/c4cp05167j), 2014-11-28
Supplement: c4cp05167j1.pdf [file c4cp05167j1.pdf]

# **N Lone-pair $\cdots\pi$ Interaction: A Rotational Study of Chlorotrifluoroethylene $\cdots$ Ammonia**

## **Electronic Supplementary Information**

### **Content:**

- 1) Table of transition frequencies.
- 2) MP2/aug-cc-pVDZ geometry of the observed conformer.
- 3) Tables of the changes of the quadrupole coupling constants as functions of the two angles.

**1) Table 1S:** Experimental transition frequencies ( $\nu$ , MHz) and observed minus calculated values ( $\Delta\nu$ , kHz) of the four isotopologues

| $J'(K'_aK'_c)-J''(K''_aK''_c)$ | $F_1'+1/2, F'$ $F_1''+1/2, F''$ |           | $C_2F_3^{35}Cl-^{14}NH_3$ |                  | $C_2F_3^{37}Cl-^{14}NH_3$ |                  | $C_2F_3^{35}Cl-^{14}ND_3$ |                  | $F_1'+1/2, F_1''+1/2,$ |   | $C_2F_3^{35}Cl-^{15}NH_3$ |                  |
|--------------------------------|---------------------------------|-----------|---------------------------|------------------|---------------------------|------------------|---------------------------|------------------|------------------------|---|---------------------------|------------------|
|                                |                                 |           | $\nu$ /MHz                | $\Delta\nu$ /kHz | $\nu$ /MHz                | $\Delta\nu$ /kHz | $\nu$ /MHz                | $\Delta\nu$ /kHz |                        |   | $\nu$ /MHz                | $\Delta\nu$ /kHz |
| $3_{0,3}-2_{0,2}$              | 5 6                             | 4 5       | 7581.6504                 | 0.3              | 7445.2468                 | 2.1              | 7091.0957                 | 2.3              | 5                      | 4 | 7452.1613                 | 1.6              |
|                                | 5 5                             | 4 4       | 7581.6262                 | -2.1             | 7445.2221                 | -0.8             | 7091.0382                 | -2.7             | 4                      | 3 | 7451.2625                 | 0.3              |
|                                | 5 4                             | 4 3       | 7581.6504                 | 4.6              | 7445.2468                 | 6.6              | 7091.0773                 | -0.9             | 3                      | 2 | 7450.2652                 | 3.0              |
|                                | 4 5                             | 3 4       | 7580.7670                 | -1.1             | 7444.5819                 | -2.3             | 7090.1832                 | 0.5              | 2                      | 1 | 7451.2354                 | -1.1             |
|                                | 4 4                             | 3 3       | 7580.7187                 | 2.7              | 7444.5362                 | 4.0              | 7090.0524                 | -6.5             |                        |   |                           |                  |
|                                | 4 3                             | 3 2       | 7580.7802                 | 2.2              | 7444.5939                 | 0.0              | 7090.2097                 | 3.0              |                        |   |                           |                  |
|                                | 3 4                             | 2 3       | 7579.6441                 | -4.0             | 7443.6002                 | -3.6             | 7089.5407                 | -1.6             |                        |   |                           |                  |
|                                | 3 3                             | 2 2       | 7579.5722                 | -0.8             | 7443.5331                 | 4.6              | 7089.3690                 | 4.1              |                        |   |                           |                  |
|                                | 3 2                             | 2 1       | 7579.6793                 | -0.5             | 7443.6312                 | -4.4             | 7089.6221                 | 4.2              |                        |   |                           |                  |
|                                | 2 3                             | 1 2       | 7580.6156                 | 2.2              | 7444.3161                 | -3.2             | 7090.5494                 | -0.2             |                        |   |                           |                  |
|                                | 2 2                             | 1 1       | 7580.5192                 | -0.5             | 7444.2340                 | 8.1              |                           |                  |                        |   |                           |                  |
| $3_{1,3}-2_{1,2}$              | 5 6                             | 4 5       | 7460.4778                 | 2.2              | 7323.8277                 | 0.5              | 6971.7076                 | 1.8              | 5                      | 4 | 7332.2024                 | 0.3              |
|                                | 5 5                             | 4 4       | 7460.4331                 | 1.7              | 7323.7882                 | 5.3              | 6971.6012                 | 0.6              | 4                      | 3 | 7330.7870                 | -1.6             |
|                                | 5 4                             | 4 3       | 7460.4778                 | 0.4              | 7323.8277                 | -1.4             | 6971.7076                 | 0.3              | 3                      | 2 | 7329.2340                 | 0.0              |
|                                | 4 5                             | 3 4       | 7458.9428                 | -2.6             | 7322.5302                 | -1.2             | 6970.6524                 | -1.6             | 2                      | 1 | 7330.7105                 | 5.7              |
|                                | 4 4                             | 3 3       | 7458.8779                 | 0.0              | 7322.4673                 | 3.3              | 6970.4906                 | -2.9             |                        |   |                           |                  |
|                                | 4 3                             | 3 2       | 7458.9583                 | -1.5             | 7322.5449                 | -1.1             | 6970.6888                 | 3.2              |                        |   |                           |                  |
|                                | 3 4                             | 2 3       | 7457.4019                 | 0.2              | 7321.3547                 | -1.9             | 6969.0858                 | 0.2              |                        |   |                           |                  |
|                                | 3 3                             | 2 2       | 7457.3093                 | -4.8             | 7321.2698                 | 0.8              | 6968.8702                 | -2.3             |                        |   |                           |                  |
|                                | 3 2                             | 2 1       | 7457.4334                 | -5.8             | 7321.3940                 | -0.4             |                           |                  |                        |   |                           |                  |
|                                | 2 3                             | 1 2       | 7458.9892                 | -3.4             | 7322.6915                 | 3.7              |                           |                  |                        |   |                           |                  |
|                                | 2 2                             | 1 1       | 7458.8779                 | -5.8             | 7322.5779                 | -1.4             | 6969.9923                 | 1.0              |                        |   |                           |                  |
| $3_{1,2}-2_{1,1}$              | 5 6                             | 4 5       | 7752.1358                 | 1.7              | 7615.3318                 | 0.7              | 7259.5691                 | 0.4              | 5                      | 4 | 7620.8066                 | 2.7              |
|                                | 5 5                             | 4 4       | 7752.1038                 | 3.1              | 7615.2984                 | 0.7              | 7259.4929                 | -1.2             | 4                      | 3 | 7619.3771                 | 1.3              |
|                                | 5 4                             | 4 3       | 7752.1455                 | 4.1              | 7615.3318                 | -6.2             | 7259.5894                 | 2.8              | 3                      | 2 | 7620.9989                 | 2.3              |
|                                | 4 5                             | 3 4       | 7750.5821                 | 1.3              | 7614.0142                 | -4.9             | 7258.4600                 | -0.3             | 2                      | 1 | 7622.4718                 | -9.5             |
|                                | 4 4                             | 3 3       | 7750.5597                 | 0.0              | 7613.9943                 | -3.7             | 7258.4130                 | -2.8             |                        |   |                           |                  |
|                                | 4 3                             | 3 2       | 7750.5821                 | -4.8             | 7614.0278                 | 2.5              | 7258.4745                 | -0.4             |                        |   |                           |                  |
|                                | 3 4                             | 2 3       | 7752.1827                 | -1.4             | 7615.2378                 | 3.2              | 7260.1233                 | -0.9             |                        |   |                           |                  |
|                                | 3 3                             | 2 2       | 7752.1610                 | -6.6             | 7615.2257                 | 7.7              | 7260.0921                 | 0.2              |                        |   |                           |                  |
|                                | 3 2                             | 2 1       | 7752.1827                 | -8.6             | 7615.2378                 | -3.8             | 7260.1371                 | -2.6             |                        |   |                           |                  |
|                                | 2 3                             | 1 2       | 7753.7917                 | 2.7              | 7616.5832                 | -2.0             | 7261.2435                 | 2.3              |                        |   |                           |                  |
|                                | 2 2                             | 1 1       | 7753.7686                 | -2.8             | 7616.5692                 | 2.0              | 7261.2067                 | 3.4              |                        |   |                           |                  |
| $3_{2,2}-2_{2,1}$              | 5 6                             | 4 5       | 7611.9746                 | 1.4              |                           |                  |                           |                  |                        |   |                           |                  |
|                                | 5 5                             | 4 4       | 7611.8600                 | -2.0             |                           |                  |                           |                  |                        |   |                           |                  |
|                                | 5 4                             | 4 3       | 7612.0101                 | 2.1              |                           |                  |                           |                  |                        |   |                           |                  |
|                                | 4 5                             | 3 4       | 7606.4666                 | 0.8              |                           |                  |                           |                  |                        |   |                           |                  |
|                                | 4 4                             | 3 3       | 7606.4241                 | 2.4              |                           |                  |                           |                  |                        |   |                           |                  |
|                                | 4 3                             | 3 2       | 7606.4882                 | 5.6              |                           |                  |                           |                  |                        |   |                           |                  |
|                                | 3 4                             | 2 3       | 7610.3971                 | -2.0             |                           |                  |                           |                  |                        |   |                           |                  |
|                                | 3 3                             | 2 2       | 7610.3971                 | -3.6             |                           |                  |                           |                  |                        |   |                           |                  |
|                                | 3 2                             | 2 1       | 7610.3971                 | -1.0             |                           |                  |                           |                  |                        |   |                           |                  |
|                                | 2 3                             | 1 2       | 7615.7656                 | 2.8              |                           |                  |                           |                  |                        |   |                           |                  |
| 2 2                            | 1 1                             | 7753.7686 | -2.8                      |                  |                           |                  |                           |                  |                        |   |                           |                  |
| $3_{2,1}-2_{2,0}$              | 5 6                             | 4 5       | 7640.7866                 | 2.2              |                           |                  |                           |                  |                        |   |                           |                  |
|                                | 5 5                             | 4 4       | 7640.6845                 | 1.6              |                           |                  |                           |                  |                        |   |                           |                  |
|                                | 5 4                             | 4 3       | 7640.8198                 | 2.7              |                           |                  |                           |                  |                        |   |                           |                  |
|                                | 4 5                             | 3 4       | 7636.1808                 | 0.2              |                           |                  |                           |                  |                        |   |                           |                  |
|                                | 4 4                             | 3 3       | 7636.1465                 | 1.7              |                           |                  |                           |                  |                        |   |                           |                  |
|                                | 4 3                             | 3 2       | 7636.1993                 | 3.8              |                           |                  |                           |                  |                        |   |                           |                  |
|                                | 3 4                             | 2 3       | 7639.8397                 | -4.2             |                           |                  |                           |                  |                        |   |                           |                  |
|                                | 3 3                             | 2 2       | 7639.8544                 | 0.3              |                           |                  |                           |                  |                        |   |                           |                  |
|                                | 3 2                             | 2 1       | 7639.8397                 | 0.6              |                           |                  |                           |                  |                        |   |                           |                  |
|                                | 2 3                             | 1 2       | 7644.3058                 | -0.6             |                           |                  |                           |                  |                        |   |                           |                  |
| 2 2                            | 1 1                             | 7644.3205 | 2.7                       |                  |                           |                  |                           |                  |                        |   |                           |                  |
| $4_{0,4}-3_{0,3}$              | 6 7                             | 5 6       | 10076.1194                | -0.3             | 9894.6843                 | -2.4             | 9422.1509                 | -0.9             | 6                      | 5 | 9903.8493                 | -1.3             |
|                                | 6 6                             | 5 5       | 10076.0981                | -2.1             | 9894.6713                 | 4.0              | 9422.1026                 | -1.2             | 5                      | 4 | 9902.7139                 | -0.4             |
|                                | 6 5                             | 5 4       | 10076.1194                | 2.2              | 9894.6843                 | 0.2              | 9422.1408                 | -3.9             | 4                      | 3 | 9902.3494                 | 0.3              |
|                                | 5 6                             | 4 5       | 10074.9988                | 0.9              | 9893.8458                 | 0.0              | 9420.9857                 | -1.6             | 3                      | 2 | 9903.4910                 | -3.6             |
|                                | 5 5                             | 4 4       | 10074.9685                | 3.8              | 9893.8113                 | -1.3             | 9420.9056                 | -1.6             |                        |   |                           |                  |
|                                | 5 4                             | 4 3       | 10074.9988                | -0.2             | 9893.8458                 | -1.0             | 9420.9857                 | -6.1             |                        |   |                           |                  |
|                                | 4 5                             | 3 4       | 10074.5750                | -0.5             | 9893.4616                 | -1.4             | 9420.7886                 | -3.7             |                        |   |                           |                  |
|                                | 4 4                             | 3 3       | 10074.5363                | 3.0              | 9893.4185                 | -2.1             | 9420.6895                 | -1.1             |                        |   |                           |                  |
|                                | 4 3                             | 3 2       | 10074.5750                | -3.5             | 9893.4616                 | -4.4             | 9420.8063                 | 4.2              |                        |   |                           |                  |





|  |     |    |            |      |            |      |  |  |
|--|-----|----|------------|------|------------|------|--|--|
|  | 67  | 56 | 12703.8875 | 0.0  |            |      |  |  |
|  | 66  | 55 | 12703.8411 | 0.7  |            |      |  |  |
|  | 65  | 54 | 12703.9033 | 5.8  |            |      |  |  |
|  | 56  | 45 | 12704.6840 | -3.0 |            |      |  |  |
|  | 55  | 44 | 12704.6429 | -1.4 |            |      |  |  |
|  | 54  | 43 | 12704.7010 | 1.9  |            |      |  |  |
|  | 45  | 34 | 12706.9471 | -1.0 |            |      |  |  |
|  | 44  | 33 | 12706.9049 | 4.5  |            |      |  |  |
|  | 43  | 32 | 12706.9650 | -2.8 |            |      |  |  |
|  | 78  | 67 | 12713.2955 | -0.1 |            |      |  |  |
|  | 77  | 66 | 12713.2415 | 0.9  |            |      |  |  |
|  | 76  | 65 | 12713.3077 | 1.7  |            |      |  |  |
|  | 67  | 56 | 12711.1743 | -3.2 |            |      |  |  |
|  | 66  | 55 | 12711.1312 | -0.7 |            |      |  |  |
|  | 65  | 54 | 12711.1887 | 1.3  |            |      |  |  |
|  | 56  | 45 | 12711.9405 | -1.0 |            |      |  |  |
|  | 55  | 44 | 12711.8992 | -1.3 |            |      |  |  |
|  | 54  | 43 | 12711.9578 | 4.6  |            |      |  |  |
|  | 45  | 34 | 12714.0530 | -1.8 |            |      |  |  |
|  | 44  | 33 | 12714.0083 | 0.0  |            |      |  |  |
|  | 43  | 32 | 12714.0789 | 4.9  |            |      |  |  |
|  | 89  | 78 | 14998.3458 | -0.2 |            |      |  |  |
|  | 88  | 77 | 14998.3268 | -1.8 |            |      |  |  |
|  | 87  | 76 | 14998.3458 | 1.1  |            |      |  |  |
|  | 78  | 67 | 14997.1364 | -0.2 |            |      |  |  |
|  | 77  | 66 | 14997.1104 | -4.1 |            |      |  |  |
|  | 76  | 65 | 14997.1364 | 0.7  |            |      |  |  |
|  | 67  | 56 | 14996.9950 | -0.8 |            |      |  |  |
|  | 66  | 55 | 14996.9700 | -1.2 |            |      |  |  |
|  | 65  | 54 | 14996.9950 | 0.7  |            |      |  |  |
|  | 56  | 45 | 14998.2096 | 5.9  |            |      |  |  |
|  | 55  | 44 | 14998.1828 | 1.4  |            |      |  |  |
|  | 54  | 43 | 14998.1911 | -6.5 |            |      |  |  |
|  | 89  | 78 | 14877.0640 | 1.4  |            |      |  |  |
|  | 88  | 77 | 14877.0499 | -0.8 |            |      |  |  |
|  | 87  | 76 | 14877.0640 | 4.1  |            |      |  |  |
|  | 78  | 67 | 14876.5717 | -0.8 |            |      |  |  |
|  | 77  | 66 | 14876.5504 | -3.9 |            |      |  |  |
|  | 76  | 65 | 14876.5717 | 1.3  |            |      |  |  |
|  | 67  | 56 | 14876.1361 | -3.2 |            |      |  |  |
|  | 66  | 55 | 14876.1114 | -6.8 |            |      |  |  |
|  | 65  | 54 | 14876.1361 | 0.0  |            |      |  |  |
|  | 56  | 45 | 14876.6324 | 3.6  |            |      |  |  |
|  | 55  | 44 | 14876.6069 | -4.1 |            |      |  |  |
|  | 54  | 43 | 14876.6264 | 6.2  |            |      |  |  |
|  | 89  | 78 | 15442.7970 | 1.7  |            |      |  |  |
|  | 88  | 77 | 15442.7826 | -1.6 |            |      |  |  |
|  | 87  | 76 | 15442.7970 | 0.1  |            |      |  |  |
|  | 78  | 67 | 15442.0357 | -3.2 |            |      |  |  |
|  | 77  | 66 | 15442.0238 | 1.7  |            |      |  |  |
|  | 76  | 65 | 15442.0529 | 1.9  |            |      |  |  |
|  | 67  | 56 | 15442.2441 | 0.6  |            |      |  |  |
|  | 66  | 55 | 15442.2161 | 1.5  |            |      |  |  |
|  | 65  | 54 | 15442.2441 | 6.0  |            |      |  |  |
|  | 56  | 45 | 15442.9895 | -1.2 |            |      |  |  |
|  | 55  | 44 | 15442.9755 | -2.8 |            |      |  |  |
|  | 54  | 43 | 15442.9895 | 0.4  |            |      |  |  |
|  | 910 | 89 | 17434.6953 | -0.9 | 17118.6565 | -0.5 |  |  |
|  | 99  | 88 | 17434.6764 | -4.5 | 17118.6360 | -5.7 |  |  |
|  | 98  | 87 | 17434.6953 | 0.4  | 17118.6565 | 0.8  |  |  |
|  | 89  | 78 | 17433.6272 | 0.0  | 17117.8474 | 2.4  |  |  |
|  | 88  | 77 | 17433.6080 | -0.6 | 17117.8230 | -3.4 |  |  |
|  | 87  | 76 | 17433.6272 | 1.1  | 17117.8474 | 3.5  |  |  |
|  | 78  | 67 | 17433.4983 | -1.3 | 17117.7326 | 0.3  |  |  |
|  | 77  | 66 | 17433.4753 | -4.2 | 17117.7078 | -4.4 |  |  |
|  | 76  | 65 | 17433.4983 | 0.4  | 17117.7326 | 2.0  |  |  |
|  | 67  | 56 | 17434.5648 | -2.5 | 17118.5431 | -0.3 |  |  |
|  | 66  | 55 | 17434.5408 | -8.2 | 17118.5158 | -9.3 |  |  |
|  | 65  | 54 | 17434.5648 | 1.8  | 17118.5431 | 4.0  |  |  |

|                                    |      |            |            |      |           |     |           |      |   |   |           |      |
|------------------------------------|------|------------|------------|------|-----------|-----|-----------|------|---|---|-----------|------|
| 7 <sub>1,7</sub> -6 <sub>1,6</sub> | 9 10 | 8 9        | 17336.9909 | 2.5  |           |     |           |      |   |   |           |      |
|                                    | 9 9  | 8 8        | 17336.9783 | -0.5 |           |     |           |      |   |   |           |      |
|                                    | 9 8  | 8 7        | 17336.9909 | 4.9  |           |     |           |      |   |   |           |      |
|                                    | 8 9  | 7 8        | 17336.5462 | -1.1 |           |     |           |      |   |   |           |      |
|                                    | 8 8  | 7 7        | 17336.5315 | -2.1 |           |     |           |      |   |   |           |      |
|                                    | 8 7  | 7 6        | 17336.5462 | 0.9  |           |     |           |      |   |   |           |      |
|                                    | 7 8  | 6 7        | 17336.2282 | 0.7  |           |     |           |      |   |   |           |      |
|                                    | 7 7  | 6 6        | 17336.2075 | -4.4 |           |     |           |      |   |   |           |      |
|                                    | 7 6  | 6 5        | 17336.2282 | 3.7  |           |     |           |      |   |   |           |      |
|                                    | 6 7  | 5 6        | 17336.6701 | 1.5  |           |     |           |      |   |   |           |      |
|                                    | 6 6  | 5 5        | 17336.6551 | -0.3 |           |     |           |      |   |   |           |      |
| 6 5                                | 5 4  | 17336.6701 | 7.7        |      |           |     |           |      |   |   |           |      |
| 7 <sub>1,6</sub> -6 <sub>1,5</sub> | 9 10 | 8 9        | 17977.4510 | 4.2  |           |     |           |      |   |   |           |      |
|                                    | 9 9  | 8 8        | 17977.4327 | -1.2 |           |     |           |      |   |   |           |      |
|                                    | 9 8  | 8 7        | 17977.4510 | 4.4  |           |     |           |      |   |   |           |      |
|                                    | 8 9  | 7 8        | 17977.5968 | 3.6  |           |     |           |      |   |   |           |      |
|                                    | 8 8  | 7 7        | 17977.5801 | -1.1 |           |     |           |      |   |   |           |      |
|                                    | 8 7  | 7 6        | 17977.5801 | 1.9  |           |     |           |      |   |   |           |      |
|                                    | 7 8  | 6 7        | 17976.7549 | -2.0 |           |     |           |      |   |   |           |      |
|                                    | 7 7  | 6 6        | 17976.7549 | -3.6 |           |     |           |      |   |   |           |      |
|                                    | 7 6  | 6 5        | 17976.7549 | -4.2 |           |     |           |      |   |   |           |      |
|                                    | 6 7  | 5 6        | 17977.6072 | 1.1  |           |     |           |      |   |   |           |      |
|                                    | 6 6  | 5 5        | 17977.6072 | 1.2  |           |     |           |      |   |   |           |      |
| 3 <sub>2,2</sub> -2 <sub>1,1</sub> | 5 6  | 4 5        | 10367.9379 | 1.6  |           |     |           |      |   |   |           |      |
|                                    | 5 5  | 4 4        | 10367.9379 | 7.9  |           |     |           |      |   |   |           |      |
|                                    | 5 4  | 4 3        | 10367.9379 | 0.5  |           |     |           |      |   |   |           |      |
|                                    | 4 5  | 3 4        | 10364.3350 | 4.8  |           |     |           |      |   |   |           |      |
|                                    | 4 4  | 3 3        | 10364.3350 | 5.7  |           |     |           |      |   |   |           |      |
|                                    | 4 3  | 3 2        | 10364.3350 | 5.2  |           |     |           |      |   |   |           |      |
|                                    | 3 4  | 2 3        | 10366.8922 | -1.3 |           |     |           |      |   |   |           |      |
|                                    | 3 3  | 2 2        | 10366.8922 | -0.6 |           |     |           |      |   |   |           |      |
|                                    | 3 2  | 2 1        | 10366.8922 | -1.4 |           |     |           |      |   |   |           |      |
|                                    | 2 3  | 1 2        | 10370.5448 | 2.7  |           |     |           |      |   |   |           |      |
|                                    | 2 2  | 1 1        | 10370.5448 | 2.8  |           |     |           |      |   |   |           |      |
| 3 <sub>2,1</sub> -2 <sub>1,2</sub> | 5 6  | 4 5        | 10692.9214 | 1.6  |           |     |           |      |   |   |           |      |
|                                    | 5 5  | 4 4        | 10693.0519 | -1.7 |           |     |           |      |   |   |           |      |
|                                    | 5 4  | 4 3        | 10692.8823 | 1.4  |           |     |           |      |   |   |           |      |
|                                    | 4 5  | 3 4        | 10703.5503 | -2.2 |           |     |           |      |   |   |           |      |
|                                    | 4 4  | 3 3        | 10703.6067 | -0.1 |           |     |           |      |   |   |           |      |
|                                    | 4 3  | 3 2        | 10703.5353 | 2.5  |           |     |           |      |   |   |           |      |
|                                    | 3 4  | 2 3        | 10696.3197 | -2.4 |           |     |           |      |   |   |           |      |
|                                    | 3 3  | 2 2        | 10696.3303 | 1.0  |           |     |           |      |   |   |           |      |
|                                    | 3 2  | 2 1        | 10696.3197 | -0.9 |           |     |           |      |   |   |           |      |
|                                    | 2 3  | 1 2        | 10695.8034 | 1.2  |           |     |           |      |   |   |           |      |
|                                    | 2 2  | 1 1        | 10695.8179 | 5.8  |           |     |           |      |   |   |           |      |
| 3 <sub>3,1</sub> -2 <sub>2,0</sub> | 5 6  | 4 5        | 12444.4254 | 2.0  |           |     |           |      |   |   |           |      |
|                                    | 5 5  | 4 4        | 12444.4649 | 2.3  |           |     |           |      |   |   |           |      |
|                                    | 5 4  | 4 3        | 12444.4254 | 2.1  |           |     |           |      |   |   |           |      |
|                                    | 4 5  | 3 4        | 12445.3328 | 1.3  |           |     |           |      |   |   |           |      |
|                                    | 4 4  | 3 3        | 12445.3945 | -0.7 |           |     |           |      |   |   |           |      |
|                                    | 4 3  | 3 2        | 12445.3135 | -5.4 |           |     |           |      |   |   |           |      |
|                                    | 3 4  | 2 3        | 12446.4146 | 0.2  |           |     |           |      |   |   |           |      |
|                                    | 3 3  | 2 2        | 12446.4995 | 0.4  |           |     |           |      |   |   |           |      |
|                                    | 3 2  | 2 1        | 12446.3818 | 3.0  |           |     |           |      |   |   |           |      |
|                                    | 2 3  | 1 2        | 12445.4349 | 4.0  |           |     |           |      |   |   |           |      |
|                                    | 2 2  | 1 1        | 12445.5334 | -0.3 |           |     |           |      |   |   |           |      |
| 3 <sub>3,0</sub> -2 <sub>2,1</sub> | 5 6  | 4 5        | 12451.9447 | -0.1 |           |     |           |      |   |   |           |      |
|                                    | 5 5  | 4 4        | 12451.9890 | -1.0 |           |     |           |      |   |   |           |      |
|                                    | 5 4  | 4 3        | 12451.9447 | 1.4  |           |     |           |      |   |   |           |      |
|                                    | 4 5  | 3 4        | 12453.4955 | 2.2  |           |     |           |      |   |   |           |      |
|                                    | 4 4  | 3 3        | 12453.5584 | -1.3 |           |     |           |      |   |   |           |      |
|                                    | 4 3  | 3 2        | 12453.4771 | -2.4 |           |     |           |      |   |   |           |      |
|                                    | 3 4  | 2 3        | 12454.1256 | 0.8  |           |     |           |      |   |   |           |      |
|                                    | 3 3  | 2 2        | 12454.2082 | -1.0 |           |     |           |      |   |   |           |      |
|                                    | 3 2  | 2 1        | 12454.0939 | 4.1  |           |     |           |      |   |   |           |      |
|                                    | 2 3  | 1 2        | 12452.5062 | 0.3  |           |     |           |      |   |   |           |      |
|                                    | 2 2  | 1 1        | 12452.6099 | 0.5  |           |     |           |      |   |   |           |      |
| 4 <sub>0,4</sub> -3 <sub>1,3</sub> | 6 7  | 5 6        | 9367.7202  | 1.9  | 9174.9427 | 5.7 | 8734.5648 | -1.6 | 6 | 5 | 9201.8954 | -0.8 |
|                                    | 6 6  | 5 5        | 9367.7202  | -1.7 | 9174.9427 | 1.6 | 8734.5800 | -0.2 | 5 | 4 | 9204.5638 | 0.4  |

|  |     |     |            |      |            |      |           |      |   |   |            |      |
|--|-----|-----|------------|------|------------|------|-----------|------|---|---|------------|------|
|  | 6 5 | 5 4 | 9367.7078  | -2.7 | 9174.9247  | -4.6 | 8734.5470 | 0.6  | 4 | 3 | 9202.4172  | -1.6 |
|  | 5 6 | 4 5 | 9370.2472  | 1.0  | 9176.7556  | -3.0 | 8737.6018 | 1.9  | 3 | 2 | 9199.7676  | -0.1 |
|  | 5 5 | 4 4 | 9370.2290  | 1.6  | 9176.7380  | -2.3 | 8737.5628 | 2.0  |   |   |            |      |
|  | 5 4 | 4 3 | 9370.2472  | 4.2  | 9176.7556  | 0.1  | 8737.5841 | -4.9 |   |   |            |      |
|  | 4 5 | 3 4 | 9368.1171  | -1.9 | 9175.1281  | -4.6 | 8735.4431 | 0.4  |   |   |            |      |
|  | 4 4 | 3 3 | 9368.0892  | 0.6  | 9175.1050  | 2.6  | 8735.3754 | 0.3  |   |   |            |      |
|  | 4 3 | 3 2 | 9368.1171  | 0.1  | 9175.1281  | -2.6 | 8735.4431 | 6.8  |   |   |            |      |
|  | 3 4 | 2 3 | 9365.6140  | 0.9  | 9173.3245  | -1.9 | 8732.4562 | -2.7 |   |   |            |      |
|  | 3 3 | 2 2 | 9365.5888  | 0.3  | 9173.3000  | -1.7 | 8732.4043 | 2.2  |   |   |            |      |
|  | 3 2 | 2 1 | 9365.5888  | 5.4  | 9173.3000  | 2.9  | 8732.3939 | 7.2  |   |   |            |      |
|  | 6 7 | 5 6 | 10646.9918 | 2.1  | 10476.3686 | 5.1  | 9974.6369 | -3.9 | 6 | 5 | 10469.6549 | 3.0  |
|  | 6 6 | 5 5 | 10646.9446 | 2.4  | 10476.3105 | -5.3 | 9974.5234 | 2.0  | 5 | 4 | 10465.0895 | -0.8 |
|  | 6 5 | 5 4 | 10646.9918 | -0.2 | 10476.3686 | 2.7  | 9974.6515 | 4.9  | 4 | 3 | 10465.9292 | -0.8 |
|  | 5 6 | 4 5 | 10642.5374 | -1.9 | 10473.0436 | 1.4  | 9969.8297 | 1.5  | 3 | 2 | 10470.4948 | -1.2 |
|  | 5 5 | 4 4 | 10642.4820 | -2.5 | 10472.9834 | -3.5 | 9969.6901 | -0.8 |   |   |            |      |
|  | 5 4 | 4 3 | 10642.5450 | -0.4 | 10473.0436 | -4.5 | 9969.8433 | -3.7 |   |   |            |      |
|  | 4 5 | 3 4 | 10643.2854 | -1.0 | 10473.5318 | 1.1  | 9970.9148 | -0.2 |   |   |            |      |
|  | 4 4 | 3 3 | 10643.2264 | 2.2  | 10473.4664 | -1.6 | 9970.7644 | 4.2  |   |   |            |      |
|  | 4 3 | 3 2 | 10643.2979 | 2.6  | 10473.5318 | -7.6 | 9970.9482 | 7.3  |   |   |            |      |
|  | 3 4 | 2 3 | 10647.7435 | -0.5 | 10476.8544 | -1.7 | 9975.7396 | 6.6  |   |   |            |      |
|  | 3 3 | 2 2 | 10647.6798 | 0.2  | 10476.7908 | -0.7 | 9975.5724 | -2.5 |   |   |            |      |
|  | 3 2 | 2 1 | 10647.7435 | 6.3  | 10476.8544 | 5.1  | 9975.7155 | -3.0 |   |   |            |      |
|  | 6 7 | 5 6 | 12757.8439 | 0.4  | 12610.9455 | 0.9  |           |      |   |   |            |      |
|  | 6 6 | 5 5 | 12757.8174 | 0.6  | 12610.9163 | -1.6 |           |      |   |   |            |      |
|  | 6 5 | 5 4 | 12757.8439 | -3.2 | 12610.9455 | -2.6 |           |      |   |   |            |      |
|  | 5 6 | 4 5 | 12753.4616 | -1.5 | 12607.7991 | 3.9  |           |      |   |   |            |      |
|  | 5 5 | 4 4 | 12753.4369 | -2.3 | 12607.7674 | -3.3 |           |      |   |   |            |      |
|  | 5 4 | 4 3 | 12753.4616 | -4.4 | 12607.7991 | 1.3  |           |      |   |   |            |      |
|  | 4 5 | 3 4 | 12755.2349 | -1.5 | 12609.0392 | 4.4  |           |      |   |   |            |      |
|  | 4 4 | 3 3 | 12755.2101 | -2.3 | 12609.0081 | -2.6 |           |      |   |   |            |      |
|  | 4 3 | 3 2 | 12755.2349 | -5.8 | 12609.0392 | 0.5  |           |      |   |   |            |      |
|  | 3 4 | 2 3 | 12759.6053 | -2.1 | 12612.1835 | 4.5  |           |      |   |   |            |      |
|  | 3 3 | 2 2 | 12759.5795 | -0.3 | 12612.1481 | -3.4 |           |      |   |   |            |      |
|  | 3 2 | 2 1 | 12759.6141 | 1.5  | 12612.1835 | -0.1 |           |      |   |   |            |      |
|  | 6 7 | 5 6 | 13445.1339 | -3.5 |            |      |           |      |   |   |            |      |
|  | 6 6 | 5 5 | 13445.2773 | 2.5  |            |      |           |      |   |   |            |      |
|  | 6 5 | 5 4 | 13445.1029 | -1.7 |            |      |           |      |   |   |            |      |
|  | 5 6 | 4 5 | 13446.0983 | -1.6 |            |      |           |      |   |   |            |      |
|  | 5 5 | 4 4 | 13445.1895 | -1.3 |            |      |           |      |   |   |            |      |
|  | 5 4 | 4 3 | 13445.0691 | -5.1 |            |      |           |      |   |   |            |      |
|  | 4 5 | 3 4 | 13451.0036 | -2.1 |            |      |           |      |   |   |            |      |
|  | 4 4 | 3 3 | 13451.0711 | -1.7 |            |      |           |      |   |   |            |      |
|  | 4 3 | 3 2 | 13450.9768 | 0.2  |            |      |           |      |   |   |            |      |
|  | 3 4 | 2 3 | 13440.0983 | 0.9  |            |      |           |      |   |   |            |      |
|  | 3 3 | 2 2 | 13440.1850 | 0.6  |            |      |           |      |   |   |            |      |
|  | 3 2 | 2 1 | 13440.0252 | 4.9  |            |      |           |      |   |   |            |      |
|  | 6 7 | 5 6 | 16919.1648 | 1.1  |            |      |           |      |   |   |            |      |
|  | 6 6 | 5 5 | 16919.1890 | -2.1 |            |      |           |      |   |   |            |      |
|  | 6 5 | 5 4 | 16919.1648 | -0.7 |            |      |           |      |   |   |            |      |
|  | 5 6 | 4 5 | 16919.9068 | -2.1 |            |      |           |      |   |   |            |      |
|  | 5 5 | 4 4 | 16919.9455 | -4.9 |            |      |           |      |   |   |            |      |
|  | 5 4 | 4 3 | 16919.9068 | -0.1 |            |      |           |      |   |   |            |      |
|  | 4 5 | 3 4 | 16920.4640 | -1.5 |            |      |           |      |   |   |            |      |
|  | 4 4 | 3 3 | 16920.5162 | -1.2 |            |      |           |      |   |   |            |      |
|  | 4 3 | 3 2 | 16920.4640 | 2.8  |            |      |           |      |   |   |            |      |
|  | 3 4 | 2 3 | 16919.6859 | -0.6 |            |      |           |      |   |   |            |      |
|  | 3 3 | 2 2 | 16919.7373 | 0.0  |            |      |           |      |   |   |            |      |
|  | 3 2 | 2 1 | 16919.7039 | 0.8  |            |      |           |      |   |   |            |      |
|  | 6 7 | 5 6 | 16919.5203 | 3.4  |            |      |           |      |   |   |            |      |
|  | 6 6 | 5 5 | 16919.5447 | 0.0  |            |      |           |      |   |   |            |      |
|  | 6 5 | 5 4 | 16919.5203 | 1.5  |            |      |           |      |   |   |            |      |
|  | 5 6 | 4 5 | 16920.2835 | -2.1 |            |      |           |      |   |   |            |      |
|  | 5 5 | 4 4 | 16920.3247 | -1.7 |            |      |           |      |   |   |            |      |
|  | 5 4 | 4 3 | 16920.2835 | 0.8  |            |      |           |      |   |   |            |      |
|  | 4 5 | 3 4 | 16920.8284 | -2.2 |            |      |           |      |   |   |            |      |
|  | 4 4 | 3 3 | 16920.8802 | -2.3 |            |      |           |      |   |   |            |      |
|  | 4 3 | 3 2 | 16920.8284 | 2.2  |            |      |           |      |   |   |            |      |
|  | 3 4 | 2 3 | 16920.0351 | 5.3  |            |      |           |      |   |   |            |      |
|  | 7 8 | 6 7 | 11767.7386 | 0.4  |            |      |           |      | 7 | 6 | 11767.0097 | 1.7  |

|  |    |    |            |      |            |      |   |   |            |      |
|--|----|----|------------|------|------------|------|---|---|------------|------|
|  | 77 | 66 | 11976.7522 | 4.9  |            |      | 6 | 5 |            |      |
|  | 76 | 65 | 11976.7280 | -3.2 |            |      | 5 | 4 | 11767.7994 | -3.7 |
|  | 67 | 56 | 11978.8305 | 0.9  |            |      | 4 | 3 | 11765.6377 | 5.6  |
|  | 66 | 55 | 11978.8229 | -2.0 |            |      |   |   |            |      |
|  | 65 | 54 | 11978.8229 | -1.3 |            |      |   |   |            |      |
|  | 56 | 45 | 11977.4542 | 2.2  |            |      |   |   |            |      |
|  | 55 | 44 | 11977.4385 | -2.8 |            |      |   |   |            |      |
|  | 54 | 43 | 11977.4542 | 8.9  |            |      |   |   |            |      |
|  | 45 | 34 | 11975.3669 | -0.5 |            |      |   |   |            |      |
|  | 44 | 33 | 11975.3669 | 3.6  |            |      |   |   |            |      |
|  | 43 | 32 | 11975.3399 | -8.1 |            |      |   |   |            |      |
|  | 78 | 67 | 12981.8265 | 2.9  |            |      | 7 | 6 | 12763.2989 | 0.3  |
|  | 77 | 66 | 12981.7814 | 1.6  |            |      | 6 | 5 | 12759.3080 | -5.4 |
|  | 76 | 65 | 12981.8265 | 0.9  |            |      | 5 | 4 | 12759.9154 | 2.0  |
|  | 67 | 56 | 12977.9173 | 0.9  |            |      | 4 | 3 | 12763.8983 | 4.3  |
|  | 66 | 55 | 12977.8684 | -0.5 |            |      |   |   |            |      |
|  | 65 | 54 | 12977.9173 | -2.5 |            |      |   |   |            |      |
|  | 56 | 45 | 12978.4640 | 0.8  |            |      |   |   |            |      |
|  | 55 | 44 | 12978.4102 | -2.0 |            |      |   |   |            |      |
|  | 54 | 43 | 12978.4640 | -2.8 |            |      |   |   |            |      |
|  | 45 | 34 | 12982.3678 | 0.5  |            |      |   |   |            |      |
|  | 44 | 33 | 12982.3168 | 0.2  |            |      |   |   |            |      |
|  | 43 | 32 | 12982.3678 | 3.1  |            |      |   |   |            |      |
|  | 56 | 45 | 8870.7002  | -0.5 | 8746.0475  | -3.8 |   |   |            |      |
|  | 55 | 44 | 8870.7920  | 0.6  | 8746.1416  | -0.1 |   |   |            |      |
|  | 54 | 43 | 8870.6767  | 6.1  | 8746.0194  | -1.6 |   |   |            |      |
|  | 45 | 34 | 8878.8657  | 2.7  | 8752.3881  | -1.7 |   |   |            |      |
|  | 44 | 33 | 8878.8861  | -1.1 | 8752.4160  | 1.0  |   |   |            |      |
|  | 43 | 32 | 8878.8489  | -3.4 | 8752.3703  | -9.3 |   |   |            |      |
|  | 34 | 23 | 8873.5106  | -1.2 | 8748.1374  | -1.8 |   |   |            |      |
|  | 33 | 22 | 8873.4905  | -5.1 | 8748.1292  | 6.5  |   |   |            |      |
|  | 32 | 21 | 8873.5187  | -1.2 | 8748.1446  | -3.4 |   |   |            |      |
|  | 23 | 12 | 8865.4793  | 0.2  | 8741.8838  | -3.8 |   |   |            |      |
|  | 22 | 11 | 8865.4563  | -4.1 | 8741.8710  | 2.3  |   |   |            |      |
|  | 56 | 45 | 12451.6068 | 1.8  |            |      |   |   |            |      |
|  | 55 | 44 | 12451.6527 | 2.8  |            |      |   |   |            |      |
|  | 54 | 43 | 12451.6068 | 3.4  |            |      |   |   |            |      |
|  | 45 | 34 | 12453.1320 | 0.5  |            |      |   |   |            |      |
|  | 44 | 33 | 12453.1986 | 0.8  |            |      |   |   |            |      |
|  | 43 | 32 | 12453.1128 | -5.0 |            |      |   |   |            |      |
|  | 34 | 23 | 12453.7744 | 1.0  |            |      |   |   |            |      |
|  | 33 | 22 | 12453.8565 | -1.2 |            |      |   |   |            |      |
|  | 32 | 21 | 12453.7411 | 2.6  |            |      |   |   |            |      |
|  | 56 | 45 | 12444.7642 | 0.8  |            |      |   |   |            |      |
|  | 55 | 44 | 12444.8025 | -0.2 |            |      |   |   |            |      |
|  | 54 | 43 | 12444.7642 | 1.1  |            |      |   |   |            |      |
|  | 45 | 34 | 12445.6961 | 2.8  |            |      |   |   |            |      |
|  | 44 | 33 | 12445.7559 | -1.2 |            |      |   |   |            |      |
|  | 43 | 32 | 12445.6715 | -9.1 |            |      |   |   |            |      |
|  | 34 | 23 | 12446.7642 | -1.4 |            |      |   |   |            |      |
|  | 33 | 22 | 12446.8479 | -2.6 |            |      |   |   |            |      |
|  | 32 | 21 | 12446.7343 | 4.2  |            |      |   |   |            |      |
|  | 23 | 12 | 12445.7559 | -5.0 |            |      |   |   |            |      |
|  | 22 | 11 | 12445.8656 | 1.6  |            |      |   |   |            |      |
|  | 67 | 56 | 11615.2611 | 0.0  | 11444.7738 | -1.5 |   |   |            |      |
|  | 66 | 55 | 11615.2563 | 1.5  | 11444.8739 | 5.0  |   |   |            |      |
|  | 65 | 54 | 11615.2381 | 1.0  | 11444.7496 | -1.3 |   |   |            |      |
|  | 56 | 45 | 11623.4306 | -1.3 | 11451.0576 | -4.3 |   |   |            |      |
|  | 55 | 44 | 11623.4915 | 0.7  | 11451.1267 | 4.3  |   |   |            |      |
|  | 54 | 43 | 11623.4182 | 3.6  | 11451.0440 | -1.5 |   |   |            |      |
|  | 45 | 34 | 11619.7365 | -1.9 | 11448.1676 | -4.1 |   |   |            |      |
|  | 44 | 33 | 11619.7785 | 0.6  | 11448.2186 | 7.1  |   |   |            |      |
|  | 43 | 32 | 11619.7224 | 3.5  | 11448.1531 | -0.6 |   |   |            |      |
|  | 34 | 23 | 11611.6191 | 0.2  | 11441.9207 | -1.2 |   |   |            |      |
|  | 33 | 22 | 11611.6712 | -2.0 | 11441.9770 | 1.2  |   |   |            |      |
|  | 32 | 21 | 11611.5652 | 3.7  | 11441.8690 | 3.8  |   |   |            |      |



2) MP2/aug-cc-pVDZ geometries of the observed conformer of the complex

| bond lengths/Å |                    | angles/° |                    | dihedral angles/° |                   |
|----------------|--------------------|----------|--------------------|-------------------|-------------------|
| C2C1           | 1.339              |          |                    |                   |                   |
| Cl3C1          | 1.709              | Cl3C1C2  | 124.5              |                   |                   |
| F4C1           | 1.700              | F4C1C2   | 119.9              | F4C1C2C3          | -178.0            |
| F5C2           | 1.326              | F5C2C1   | 123.2              | F5C2C1Cl3         | -2.0              |
| F6C2           | 1.328              | F6C2C1   | 123.2              | F6C2C1Cl3         | 179.5             |
| N7C2           | 3.103 <sup>a</sup> | N7C2C1   | 101.5 <sup>a</sup> | N7C2C1Cl3         | 89.0 <sup>a</sup> |
| X8N7           | 1.000              | X8N7C2   | 176.2              | X8N7C2C1          | 154.8             |
| H9N7           | 1.020              | H9N7X8   | 67.4               | H9N7X8C2          | 76.3              |
| H10N7          | 1.020              | H10N7X8  | 67.4               | H10N7X8C2         | 120.0             |
| H11N7          | 1.020              | H11N7X8  | 67.4               | H11N7X8C2         | -120.0            |

<sup>a</sup>To reproduce the experimental rotational constants of the four isotopologues, the effective values are adjusted to 2.987 Å, 100.9° and 88.3°, respectively.

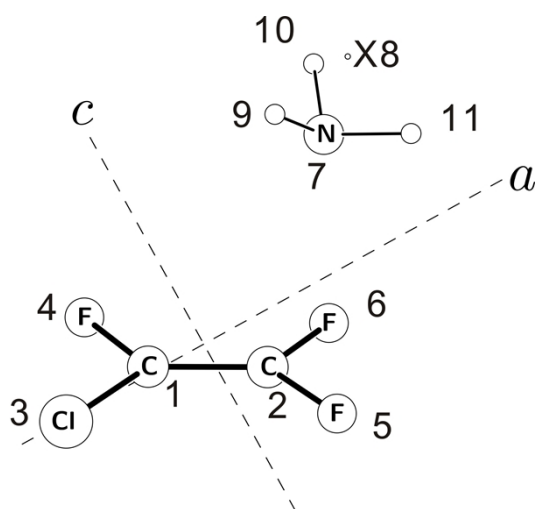



b. The MP2/aug-cc-pVDZ value of  $(\chi_{bb}-\chi_{cc})/4$  as a function of the orientation angles of  $\text{NH}_3$ .

|                          |        | $\angle X8N7C2/^\circ \rightarrow$ |        |        |        |        |        |        |        |        |        |        |        |       |       |       |       |       |       |
|--------------------------|--------|------------------------------------|--------|--------|--------|--------|--------|--------|--------|--------|--------|--------|--------|-------|-------|-------|-------|-------|-------|
|                          |        | 150                                | 155    | 160    | 165    | 166    | 166.1  | 166.11 | 166.15 | 166.2  | 166.25 | 166.5  | 167    | 170   | 175   | 176.2 | 180.1 | 185   | 190   |
|                          | 130    |                                    |        |        | -0.173 |        |        |        |        |        |        |        |        | 0.001 |       |       |       |       |       |
|                          | 135    |                                    |        | -0.317 | -0.158 |        |        |        |        |        |        |        | -0.090 | 0.013 |       |       |       |       |       |
|                          | 137    |                                    |        | -0.306 | -0.151 | -0.118 |        |        |        |        |        | -0.101 | -0.085 | 0.017 |       |       |       |       |       |
|                          | 138    |                                    |        | -0.301 | -0.147 | -0.115 | -0.111 |        |        |        | -0.107 | -0.098 | -0.082 | 0.019 |       |       |       |       |       |
|                          | 138.5  |                                    |        |        |        | -0.113 | -0.110 |        |        | -0.106 | -0.105 | -0.097 |        |       |       |       |       |       |       |
|                          | 138.6  |                                    |        |        |        | -0.113 | -0.109 | -0.109 | -0.108 | -0.106 |        | -0.096 |        |       |       |       |       |       |       |
|                          | 138.75 |                                    |        |        |        | -0.112 | -0.109 |        |        | -0.106 |        |        |        |       |       |       |       |       |       |
|                          | 139    |                                    |        | -0.295 | -0.143 | -0.111 | -0.108 |        |        | -0.105 | -0.103 | -0.095 | -0.079 | 0.021 |       |       |       |       |       |
|                          | 139.5  |                                    |        |        |        | -0.110 |        |        |        | -0.101 | -0.093 |        |        |       |       |       |       |       |       |
| $\angle X8N7C2C1/^\circ$ | 140    | -0.535                             | -0.423 | -0.290 | -0.139 | -0.108 |        |        |        |        |        | -0.092 | -0.076 | 0.024 |       |       |       |       |       |
| ↓                        | 145    |                                    |        |        | -0.118 |        |        |        |        |        |        |        | -0.058 | 0.036 |       |       |       |       |       |
|                          | 150    | -0.430                             | -0.338 | -0.226 | -0.095 |        |        |        |        |        |        |        | -0.038 | 0.051 | 0.207 |       |       |       |       |
|                          | 154.8  |                                    |        |        |        |        |        |        |        |        |        |        |        |       |       | 0.250 |       |       |       |
|                          | 160    | -0.318                             | -0.246 | -0.152 | -0.041 |        |        |        |        |        |        |        |        | 0.085 | 0.223 |       | 0.369 | 0.514 | 0.661 |
|                          | 170    |                                    |        |        |        |        |        |        |        |        |        |        |        |       | 0.242 |       |       |       |       |
|                          | 180    |                                    |        |        |        |        |        |        |        |        |        |        |        |       | 0.265 |       |       |       |       |
|                          | 190    |                                    |        |        |        |        |        |        |        |        |        |        |        |       | 0.290 |       |       |       |       |
|                          | 200    |                                    |        |        |        |        |        |        |        |        |        |        |        |       | 0.318 |       |       |       |       |
|                          | 210    |                                    |        |        |        |        |        |        |        |        |        |        |        |       | 0.347 |       |       |       |       |
|                          | 220    |                                    |        |        |        |        |        |        |        |        |        |        |        |       | 0.376 |       |       |       |       |
